# Supplementary material
Source: Springer Nature journal article supplement (https://www.springermedizin.de/resource/supplementary/12965_2005_25_MOESM5_ESM.pdf/9572944)

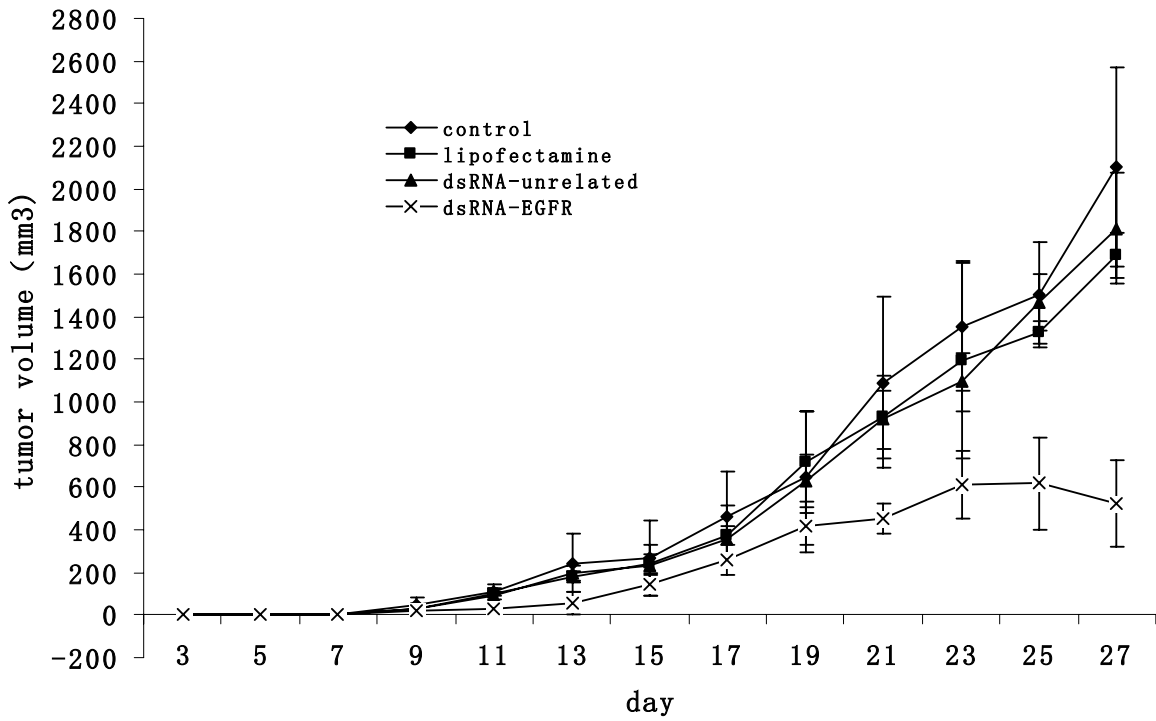

(A)

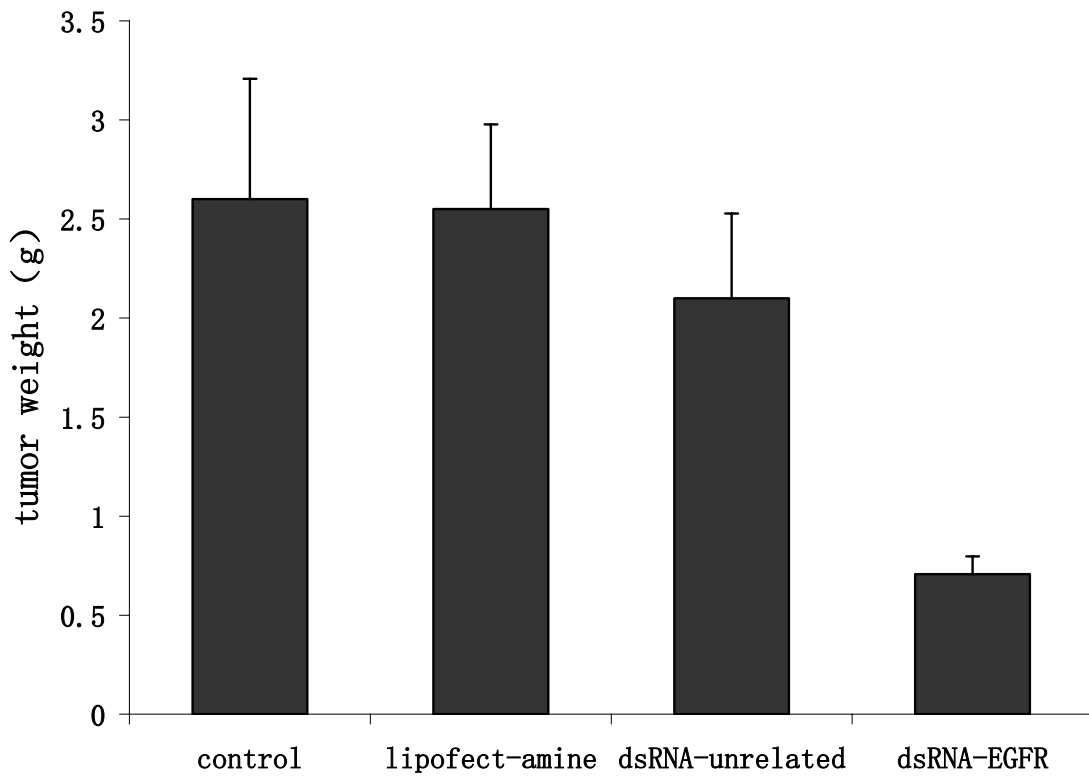

(B)

Supplement: MOESM5 [file 9572944]
